# Supplementary material for: Psychological Distress and Concerns of In-Home Older People Living with Cancer and Their Impact on Supportive Care Needs: An Observational Survey
Source: MDPI journal article supplement (doi:10.3390/curroncol30110692), 2023-10-31
Supplement: s1 [file s1]

**Table S1.** Internal consistency and correlations among instruments (Cronbach's alpha)

|                                                                                          | <i>Self-Assessment<br/>Questionnaire for<br/>Patients (SAQ-P)</i> | <i>Self-Assessment<br/>Questionnaire for<br/>family and<br/>caregivers (SAQ-<br/>FC)</i> | <i>Concerns<br/>Checklist - last<br/>month (CC-LM)</i> | <i>Concerns<br/>Checklist - last<br/>week (CC-LW)</i> | <i>Needs<br/>Evaluations<br/>Questionnaire<br/>(NEQ)</i> |
|------------------------------------------------------------------------------------------|-------------------------------------------------------------------|------------------------------------------------------------------------------------------|--------------------------------------------------------|-------------------------------------------------------|----------------------------------------------------------|
| <i>Self-Assessment<br/>Questionnaire for<br/>Patients (SAQ-P)</i>                        | (0.89)                                                            |                                                                                          |                                                        |                                                       |                                                          |
| <i>Self-Assessment<br/>Questionnaire for<br/>family and<br/>caregivers (SAQ-<br/>FC)</i> | r=0.82 (<0.001)                                                   | (0.93)                                                                                   |                                                        |                                                       |                                                          |
| <i>Concerns Checklist<br/>- last month (CC-<br/>LM)</i>                                  | r=0.74 (<0.001)                                                   | r=0.68 (<0.001)                                                                          | (0.90)                                                 |                                                       |                                                          |
| <i>Concerns Checklist<br/>- last week (CC-<br/>LW)</i>                                   | r <sub>s</sub> =0.53 (<0.001)                                     | r <sub>s</sub> =0.48 (<0.001)                                                            | r <sub>s</sub> =0.76 (<0.001)                          | (0.77)                                                |                                                          |
| <i>Needs Evaluations<br/>Questionnaire<br/>(NEQ)</i>                                     | r <sub>s</sub> =0.47 (<0.001)                                     | r <sub>s</sub> =0.47 (<0.001)                                                            | r <sub>s</sub> =0.59 (<0.001)                          | r <sub>s</sub> =0.49 (<0.001)                         | (0.95)                                                   |

**Table S1 Methodological clarifications:**

For the reliability of the instruments, Cronbach's alpha coefficient was used for the dichotomous items (scales), while Kuder-Richardson (in parenthesis) for the Likert (5-point) items as shown in a diagonal line and is explored by the Pearson-r and Spearman-rs (p-values), respectively.

All correlations among instruments showed adequate reliability ( $p=0.001$ ) allowing us to further proceed to statistical analysis.

**Table S2.** Descriptive analysis of the study instruments

| Instruments                                                             | Mean  | S.D   | Median | IQR   | Range |
|-------------------------------------------------------------------------|-------|-------|--------|-------|-------|
| <i>Self-Assessment Questionnaire for Patients (SAQ-P)</i>               | 51.09 | 22.03 | 51.11  | 36.67 | 0-100 |
| <i>Self-Assessment Questionnaire for family and caregivers (SAQ-FC)</i> | 52.46 | 24.63 | 52.63  | 3.47  | 0-100 |
| <i>Concerns Checklist - last month (CC-LM)</i>                          | 58.85 | 23.07 | 58.00  | 39.00 | 0-100 |
| <i>Concerns Checklist last week (CC-LW) *</i>                           | 5.12  | 2.93  | 5.00   | 4.00  | 1-13  |
| <i>Needs Evaluation Questionnaire (NEQ)*</i>                            | 10.63 | 7.89  | 11.00  | 16.00 | 0-23  |

\*Transformed scores (0-100); IQR=interquartile range

\*Note that CC-LW (13 items) and NEQ (23 items) scores are accounted as actual numbers – summing of the dichotomous items “Yes” (positive responses).

**Table S3.** Correlations among screening tools with respect to age and year of diagnosis.

| Tools         | Transformed scores (0-100) |                       |
|---------------|----------------------------|-----------------------|
|               | Age                        | Year of diagnosis     |
| <i>SAQ-P</i>  | $r_s=0.051, (0.623)$       | $r_s=0.031, (0.761)$  |
| <i>SAQ-FC</i> | $r_s=0.076, (0.469)$       | $r_s=0.136, (0.195)$  |
| <i>CC-LM</i>  | $r_s=0.051, (0.620)$       | $r_s=0.050, (0.629)$  |
| <i>CC-LW</i>  | $r_s=0.055, (0.593)$       | $r_s=-0.076, (0.462)$ |
| <i>NEQ</i>    | $r_s=0.008, (0.940)$       | $r_s=-0.177, (0.083)$ |

\*Transformed scores (0-100); Spearman  $r_s$  confidence; (p-values is presented in parentheses)

**Table S4.** Sex differences in significant distress with respect to the type of cancer (Kruskal-Wallis test)

| Sex    |       | Organ system | Mean Rank | Test statistics                   |
|--------|-------|--------------|-----------|-----------------------------------|
| Female | SAQ-P | Reproductive | 19.70     | $\chi^2(5)=3.052$ , p-value=0.724 |
|        |       | Urinary      | 33.83     |                                   |
|        |       | Digestive    | 27.00     |                                   |
|        |       | Respiratory  | 23.38     |                                   |
|        |       | Lymphatic    | 21.71     |                                   |
|        |       | Skeletal     | 24.50     |                                   |
| Male   | SAQ-P | Urinary      | 26.78     | $\chi^2(4)=7.580$ , p-value=0.102 |
|        |       | Digestive    | 23.23     |                                   |
|        |       | Respiratory  | 26.67     |                                   |
|        |       | Lymphatic    | 15.13     |                                   |
|        |       | Skeletal     | 45.00     |                                   |

**Table S5.** Sex differences in significant distress about family and caregivers with respect to the type of cancer (Kruskal-Wallis test)

| Sex    |        | Organ Systems | Mean Rank | Test statistics                   |
|--------|--------|---------------|-----------|-----------------------------------|
| Female | SAQ-FC | Reproductive  | 17.00     | $\chi^2(5)=4.832$ , p-value=0.462 |
|        |        | Urinary       | 29.17     |                                   |
|        |        | Digestive     | 19.29     |                                   |
|        |        | Respiratory   | 25.00     |                                   |
|        |        | Lymphatic     | 20.90     |                                   |
|        |        | Skeletal      | 35.25     |                                   |
| Male   | SAQ-FC | Urinary       | 26.57     | $\chi^2(4)=5.277$ , p-value=0.260 |
|        |        | Digestive     | 25.92     |                                   |
|        |        | Respiratory   | 22.00     |                                   |
|        |        | Lymphatic     | 14.50     |                                   |
|        |        | Skeletal      | 38.67     |                                   |

**Table S6.** Sex differences in concerns during the last month with respect to the type of cancer (Kruskal-Wallis test)

| Sex    | Organ Systems | Mean Rank | Test statistics                   |
|--------|---------------|-----------|-----------------------------------|
| Female | Reproductive  | 18.20     | $\chi^2(5)=1.928$ , p-value=0.879 |
|        | Urinary       | 29.17     |                                   |
|        | Digestive     | 27.07     |                                   |
|        | Respiratory   | 23.81     |                                   |
|        | Lymphatic     | 22.57     |                                   |
|        | Skeletal      | 24.25     |                                   |
| Male   | Urinary       | 26.28     | $\chi^2(4)=8.586$ , p-value=0.059 |
|        | Digestive     | 25.12     |                                   |
|        | Respiratory   | 26.03     |                                   |
|        | Lymphatic     | 12.75     |                                   |
|        | Skeletal      | 45.83     |                                   |

**Table S7.** Sex differences in concerns during the last week with respect to the type of cancer (Kruskal-Wallis test)

| Sex    | Organ System | Mean Rank | Test statistics                   |
|--------|--------------|-----------|-----------------------------------|
| Female | Reproductive | 18.10     | $\chi^2(5)=3.363$ , p-value=0.680 |
|        | Urinary      | 19.17     |                                   |
|        | Digestive    | 18.43     |                                   |
|        | Respiratory  | 26.56     |                                   |
|        | Lymphatic    | 26.02     |                                   |
|        | Skeletal     | 22.50     |                                   |
| Male   | Urinary      | 28.56     | $\chi^2(4)=8.844$ , p-value=0.056 |
|        | Digestive    | 21.92     |                                   |
|        | Respiratory  | 28.00     |                                   |
|        | Lymphatic    | 10.75     |                                   |
|        | Skeletal     | 40.33     |                                   |

**Table S8.** Sex differences in supportive care needs with respect to the type of cancer (Kruskal-Wallis test)

| Sex    | Organ System | Mean Rank | Test statistics                   |
|--------|--------------|-----------|-----------------------------------|
| Female | Reproductive | 15.20     | $\chi^2(5)=3.478$ , p-value=0.653 |
|        | Urinary      | 27.83     |                                   |
|        | Digestive    | 25.14     |                                   |
|        | Respiratory  | 28.25     |                                   |
|        | Lymphatic    | 22.48     |                                   |
|        | Skeletal     | 23.75     |                                   |
| Male   | Urinary      | 29.53     | $\chi^2(4)=9.861$ , p-value=0.031 |
|        | Digestive    | 28.27     |                                   |
|        | Respiratory  | 22.17     |                                   |
|        | Lymphatic    | 9.00      |                                   |
|        | Skeletal     | 39.17     |                                   |

**Tables S4-8. Methodological clarifications and interpretations:**

A greater Mean Rank is indicative of a greater instrument's total score of both: dichotomous (Yes/No) and/or transformed scores (0-100).

Types of cancers were grouped according to organ systems to identify possible correlations due to a small sampling size.

**Differences in instruments scores with respect to sex (Data not shown in Tables 4-8):**

- No significant distress differences (SAQ-P) were observed with respect to sex (t-test, Female: 50.29±23.11 vs Male: 51.81±21.21,  $t(95) = -0.337$ ,  $p=0.737$ ). [Table S4]
- No significant distress differences (SAQ-FC) were observed with respect to sex (t-test, Female: 50.18±26.05 vs Male: 54.46±23.39,  $t(90) = -0.829$ ,  $p=0.409$ ). [Table S5]
- No significant differences in concerns during the last month (CC-LM) were observed with respect to sex (t-test, Female: 60.00±22.90 vs Male: 57.80±23.39,  $t(95) = 0.466$ ,  $p=0.642$ ). [Table S6]
- Also, no significant differences in concerns during the last week (CC-LW) were observed with respect to sex (Mann-Whitney  $U=1143.00$ ,  $p=0.827$ , mean rank for Females=49.65 vs. Males=48.41). [Table S7]
- No significant differences in supportive care needs (NEQ) were observed with respect to sex (Mann-Whitney  $U=1094.5$ ,  $p=0.570$ , mean rank: Females=50.71 vs. Males =47.46).
- Significant differences in supportive care needs (NEQ) among males were observed with respect to organ system (Table S8), suggesting that male patients suffering from bone cancer (Skeletal system) presented with higher supportive care needs compared to patients suffering from other types of cancer ( $\chi^2(4)=9.861$ ,  $p\text{-value}=0.031$ ).

**Differences in instruments scores with respect to comorbidities (Data not shown in Tables S4-8):**

- Significant distress differences (SAQ-P) were observed in patients suffering from chronic diseases (mean rank: 51.14 vs. 33.83, Mann-Whitney  $U=328.00$ ,  $p=0.036$ ), compared to those free of chronic disease, suggesting that chronic diseases are associated with higher rates of significant distress.
- Significant differences in concerns during the last month (CC-LM) were observed between patients suffering from chronic diseases (mean rank 51.15 vs. 33.79, Mann-Whitney  $U=327.5$ ,  $p=0.042$ ) compared to those free of disease, suggesting that chronic diseases are associated with higher concerns compared to those free of chronic disease.
- Significant differences in concerns during the last week (CC-LW) were observed between patients suffering from chronic diseases (mean rank 51.22 vs. 33.29, Mann-Whitney  $U=321.5$ ,  $p=0.037$ ) compared to those free of disease, suggesting that chronic diseases are risk factors for increased concerns even the last week.
- No significant differences in supportive care needs (NEQ) were observed between patients suffering from chronic diseases (mean rank 49.52 vs. 45.33,  $U=466.00$ ,  $p=0.633$ ) compared to those free of disease, suggesting that chronic diseases are not associated with the increased number of supportive care needs.
